# Supplementary material for: Human Tongue Electrophysiological Response to Oleic Acid and Its Associations with PROP Taster Status and the CD36 Polymorphism (rs1761667)
Source: Nutrients. 2019 Feb 1;11(2):315. doi: 10.3390/nu11020315 (PMC6412840; doi:10.3390/nu11020315)
Supplement: Supplementary file 1 [file nutrients-11-00315-s001.pdf]

## Supplemental Material:

**Table S1.** Ratings of perceived taste intensity in response to three concentrations of PROP and NaCl in the taster groups.

|                      | <b>Super-tasters</b><br><b>(<i>n</i> = 10)</b> | <b>Medium-tasters</b><br><b>(<i>n</i> = 13)</b> | <b>Non-tasters</b><br><b>(<i>n</i> = 12)</b> |
|----------------------|------------------------------------------------|-------------------------------------------------|----------------------------------------------|
| <b>PROP (mmol/L)</b> |                                                |                                                 |                                              |
| 0.032                | 10.95 ± 2.35                                   | 5.79 ± 1.72                                     | 0.66 ± 0.33                                  |
| 0.32                 | 53.33 ± 6.20 *                                 | 35.23 ± 3.75                                    | 3.95 ± 1.02 *                                |
| 3.2                  | 91.50 ± 3.07 *                                 | 57.31 ± 3.92                                    | 28.84 ± 4.93 *                               |
| <b>NaCl (mol/L)</b>  |                                                |                                                 |                                              |
| 0.01                 | 2.18 ± 0.72                                    | 8.63 ± 2.67                                     | 3.52 ± 1.42                                  |
| 0.1                  | 26.55 ± 5.66 *                                 | 33.01 ± 5.05                                    | 28.50 ± 4.52 *                               |
| 1                    | 58.67 ± 5.95 *                                 | 64.49 ± 6.63                                    | 58.50 ± 4.75 *                               |

Values are means ± SEM. *n* = 35. Three-way ANOVA was used to compare PROP intensity ratings with NaCl intensity ratings across groups ( $F_{(4,192)} = 5.302$ ;  $p = 0.00045$ ).

\* Significant difference between PROP and the corresponding NaCl concentration ( $p < 0.00022$ ; Newman Keuls test).

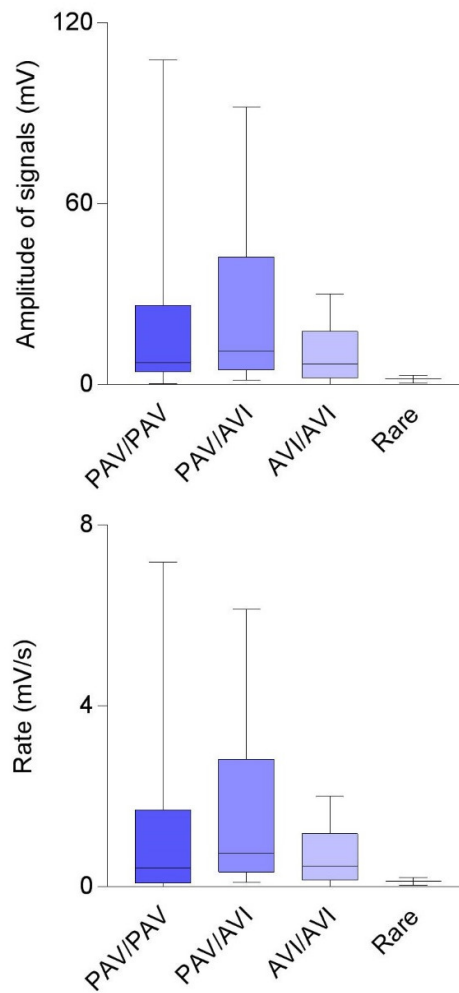

**Figure S1.** Box-and-whisker plots showing the minimum, first quartile, median, third quartile, and maximum of each data set of amplitude and rate of signals evoked by oleic acid (30  $\mu$ l) taste stimulation in individuals with genotypes PAV/PAV ( $n = 7$ ), PAV/AVI ( $n = 16$ ), AVI/AVI ( $n = 10$ ) and rare genotypes ( $n = 2$ ) of *TAS2R38*. One-way ANOVA showed no difference of amplitude and hyperpolarization rate related to the *TAS2R38* genotype ( $p > 0.05$ ).

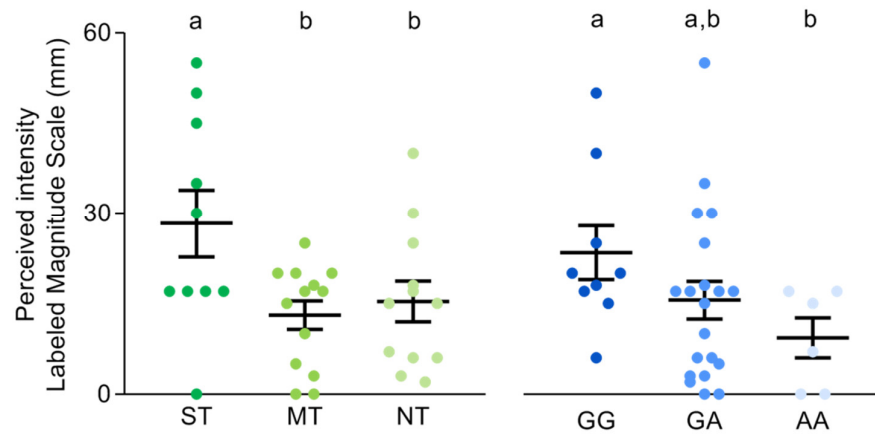

**Figure S2.** Distribution of data of the perceived intensity after taste stimulation with oleic acid (30  $\mu$ l) in super-tasters (ST;  $n = 10$ ), medium-tasters (MT;  $n=13$ ) and non-tasters (NT;  $n = 12$ ), and in volunteers with genotypes GG ( $n = 9$ ), GA ( $n = 20$ ) and AA ( $n = 6$ ) of *CD36*. Mean values  $\pm$  SEM are also shown. Different letters indicate a significant difference ( $p \leq 0.046$ ; Duncan's test and  $p = 0.047$  Fisher LDS test, subsequent one-way ANOVA).

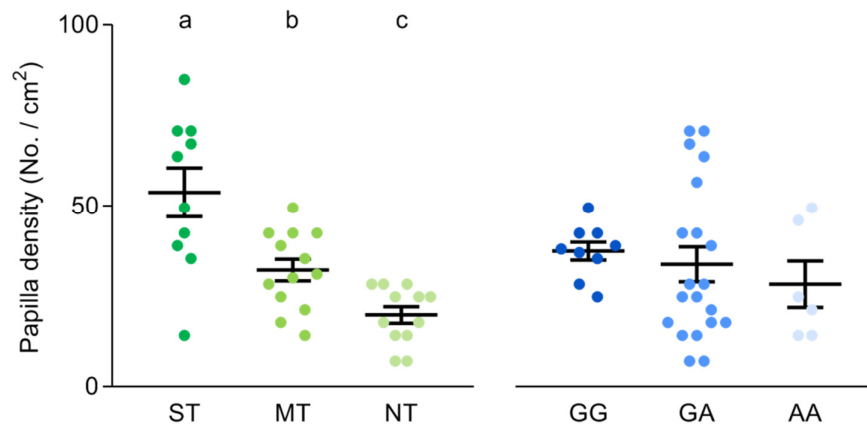

**Figure S3.** Distribution of data of the density of fungiform papillae in super-tasters (ST;  $n = 10$ ), medium-tasters (MT;  $n=13$ ) and non-tasters (NT;  $n = 12$ ), and in volunteers with genotypes GG ( $n = 9$ ), GA ( $n = 20$ ) and AA ( $n = 6$ ) of *CD36*. Mean values  $\pm$  SEM are also shown. Different letters indicate a significant difference ( $p \leq 0.032$ ; Duncan's test subsequent one-way ANOVA).

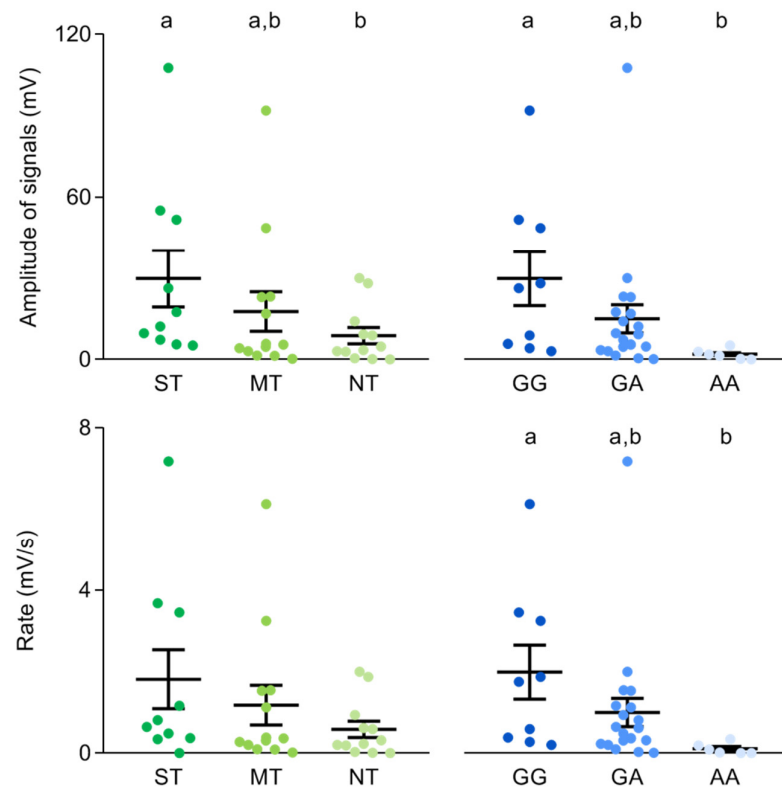

**Figure S4.** Distribution of data of amplitude and rate of signals evoked in super-tasters (ST;  $n = 10$ ), medium-tasters (MT;  $n=13$ ) and non-tasters (NT;  $n = 12$ ), and in volunteers with genotypes GG ( $n = 9$ ), GA ( $n = 20$ ) and AA ( $n = 6$ ) of *CD36*. Mean values  $\pm$  SEM are also shown. Different letters indicate a significant difference ( $p \leq 0.05$ ; Fisher LDS or Duncan's test subsequent one-way ANOVA).
